# Supplementary material
Source: PubMed Central journal article supplement (PMC7899074)
Supplement: 11154_2021_9630_MOESM2_ESM.pdf [file 11154_2021_9630_MOESM2_ESM.pdf]

| Study                           | Selection bias | Study design    | Data collection | Global rating |
|---------------------------------|----------------|-----------------|-----------------|---------------|
| Abrishami A et al. (35)         | Moderate       | Retrospective   | strong          | moderate      |
| Aggarwal S et al. (36)          | Weak           | Retrospective   | Low             | Low           |
| Alberici F et al. (37)          | Strong         | Retrospective   | Low             | low           |
| Argenziano GM et al. (38)       | Weak           | Retrospective   | Moderate        | Moderate      |
| Arshad S et al. (39)            | Moderate       | Retrospective   | Strong          | Moderate      |
| Bezzio C et al. (40)            | Strong         | Prospective     | Moderate        | moderate      |
| Borba MGS et al. (41)           | Strong         | Prospective RCT | Strong          | moderate      |
| Burns GP et al. (42)            | Strong         | Retrospective   | Low             | low           |
| Campochiaro C et al. (43)       | Strong         | Retrospective   | Strong          | Moderate      |
| Cao B et al. (44)               | moderate       | Prospective     | moderate        | moderate      |
| Capra R et al. (45)             | Moderate       | Retrospective   | Moderate        | Moderate      |
| Cheng Y et al. (46)             | Weak           | Retrospective   | Strong          | Strong        |
| Chilimuri S et al. (47)         | Moderate       | Retrospective   | Moderate        | Moderate      |
| Chung MS et al. (48)            | weak           | Retrospective   | Strong          | strong        |
| Cui X et al. (49)               | Moderate       | Retrospective   | Moderate        | Moderate      |
| De Smet R et al. (50)           | moderate       | Retrospective   | low             | low           |
| Du RH et al. (51)               | Weak           | Prospective     | Strong          | Strong        |
| Feng Y et al. (52)              | weak           | Retrospective   | Strong          | strong        |
| Gao S et al. (53)               | moderate       | Retrospective   | Strong          | moderate      |
| Gregoriano C et al. (54)        | Weak           | Retrospective   | Strong          | strong        |
| Grein J et al. (55)             | Strong         | Retrospective   | Moderate        | moderate      |
| Hong KS et al. (56)             | Weak           | retrospective   | Strong          | strong        |
| Huang M et al (57)              | Strong         | Retrospective   | Strong          | Moderate      |
| Inciardi M et al. (58)          | Weak           | retrospective   | Strong          | Strong        |
| Israelsen SB et al. (59)        | Weak           | Retrospective   | Strong          | strong        |
| Itelman E et al. (60)           | Weak           | Retrospective   | Moderate        | Moderate      |
| Jang JG et al. (61)             | Moderate       | retrospective   | Strong          | moderate      |
| Lagi F et al. (62)              | Weak           | Retrospective   | Strong          | Strong        |
| Lecronier M et al. (63)         | Moderate       | Retrospective   | moderate        | moderate      |
| Lewnard JA et al. (64)          | Weak           | Prospective     | Moderate        | Moderate      |
| Li L et al. (65)                | Moderate       | Prospective     | Strong          | moderate      |
| Li R et al. (66)                | Moderate       | Retrospective   | Low             | Low           |
| Li X et al. (67)                | Strong         | retrospective   | low             | low           |
| Liu X et al. (68) *             | Strong         | retrospective   | Strong          | moderate      |
| McMichael TM et al. (69)        | moderate       | Retrospective   | moderate        | moderate      |
| Meng Y et al. (70)              | moderate       | Retrospective   | Strong          | moderate      |
| Miyashita S et al. (71)         | Strong         | Retrospective   | Strong          | Moderate      |
| Moghaddam A et al. (72)         | Moderate       | Retrospective   | Low             | Low           |
| Morena V et al. (73)            | Strong         | prospective     | Moderate        | moderate      |
| Myrstad M et al. (74)           | Moderate       | Prospective     | Low             | low           |
| Na KR et al. (75)               | Strong         | Retrospective   | Low             | low           |
| Nightingale R et al. (76)       | strong         | Retrospective   | moderate        | Low           |
| Nikpouraghdam M et al (77)      | Weak           | Retrospective   | Low             | Low           |
| Nowak B et al. (78)             | Weak           | Retrospective   | Moderate        | moderate      |
| Pan F et al. (79)               | Strong         | Retrospective   | Moderate        | Low           |
| Pei G et al. (80)               | Weak           | Retrospective   | Moderate        | Moderate      |
| Pellaud C et al. (81)           | Moderate       | Retrospective   | Low             | Low           |
| Rastrelli G et al. (15)         | Strong         | Retrospective   | Strong          | moderate      |
| Ren H et al. (82)               | Weak           | Retrospective   | Moderate        | moderate      |
| Ruan Q et al. (83)              | moderate       | Retrospective   | Strong          | moderate      |
| Satlin MJ et al. (84)           | Strong         | Retrospective   | Moderate        | low           |
| Senkal N et al. (85)            | Strong         | Retrospective   | Strong          | Moderate      |
| Shao F et al. (86)              | Strong         | Retrospective   | moderate        | low           |
| Shi Y et al. (87)               | Weak           | Retrospective   | Low             | Low           |
| Smith AA et al. (88)            | Moderate       | Retrospective   | Low             | Low           |
| Song JW et al. (89)             | Moderate       | Prospective     | Strong          | Moderate      |
| Steinberg E et al. (90)         | Weak           | Retrospective   | Low             | Low           |
| Tang N et a. (91)               | Weak           | Retrospective   | Low             | Low           |
| Tharakan S et al. (92)          | Weak           | Retrospective   | Low             | Low           |
| Trigo J et al. (93)             | Weak           | Retrospective   | Strong          | Strong        |
| Vuagnat P et al. (94)           | Strong         | Prospective     | Moderate        | Low           |
| Wang B et al. (95)              | Strong         | Retrospective   | Moderate        | low           |
| Wang L et al. (96)              | moderate       | Retrospective   | Strong          | moderate      |
| Wang L et al. (97) <sup>o</sup> | Weak           | Retrospective   | Low             | Low           |
| Wang Y et al. (98)              | Moderate       | Retrospective   | Strong          | Moderate      |
| Xie J et al. (99)               | Moderate       | Retrospective   | Strong          | Moderate      |
| Xu J et al. (100)               | Strong         | Retrospective   | Moderate        | low           |
| Xu PP et al. (101)              | Moderate       | Retrospective   | Strong          | Moderate      |
| Xu X et al. (102)               | Strong         | Retrospective   | moderate        | low           |
| Yan Y et al. (103)              | Moderate       | Retrospective   | Strong          | Moderate      |

|                                         |          |               |          |          |
|-----------------------------------------|----------|---------------|----------|----------|
| <b>Yang BY et al. (104)</b>             | Moderate | Retrospective | Moderate | Moderate |
| <b>Yang Q et al. (105)</b>              | Weak     | Retrospective | Moderate | Moderate |
| <b>Yang X et al. (106)</b>              | Weak     | Retrospective | Weak     | Moderate |
| <b>Ye W et al. (107)</b>                | Strong   | Retrospective | Moderate | low      |
| <b>Yuan M et al. (108)</b>              | Weak     | Retrospective | Low      | Low      |
| <b>Zhang G (109)</b>                    | Moderate | Retrospective | Strong   | Moderate |
| <b>Zhang J et al. (110)</b>             | Weak     | Retrospective | Moderate | Moderate |
| <b>Zhang J et al. (111)<sup>o</sup></b> | Weak     | Retrospective | Strong   | strong   |
| <b>Zhang L et al. (112)</b>             | Moderate | Retrospective | Strong   | Moderate |
| <b>Zhang P et al. (113)*</b>            | weak     | Retrospective | Strong   | strong   |
| <b>Zhang S et al. (114)</b>             | Weak     | Retrospective | Strong   | strong   |
| <b>Zhang SY et al. (115)</b>            | Weak     | Retrospective | Moderate | Moderate |
| <b>Zhao XY et al. (116)</b>             | Moderate | Retrospective | Moderate | Moderate |
| <b>Zhou F et al. (1)</b>                | Weak     | Retrospective | Strong   | Strong   |
| <b>Zhu L et al., (6)*</b>               | Strong   | Retrospective | moderate | low      |
| <b>Zhu L et al. (117)<sup>o</sup></b>   | Strong   | Retrospective | Moderate | Low      |
| <b>Zou X et al. (118)</b>               | Weak     | Retrospective | Moderate | Moderate |

**Supplementary Table 1.** Quality assessment of the clinical studies included in the meta-analysis. \*

= same study cohort, different groups; \*\* = same study cohort, different groups;° same name but different study
