# Supplementary material
Source: PubMed Central journal article supplement (PMC7899074)
Supplement: 11154_2021_9630_MOESM4_ESM.pdf [file 11154_2021_9630_MOESM4_ESM.pdf]

Study nameEvent rate and 95%CI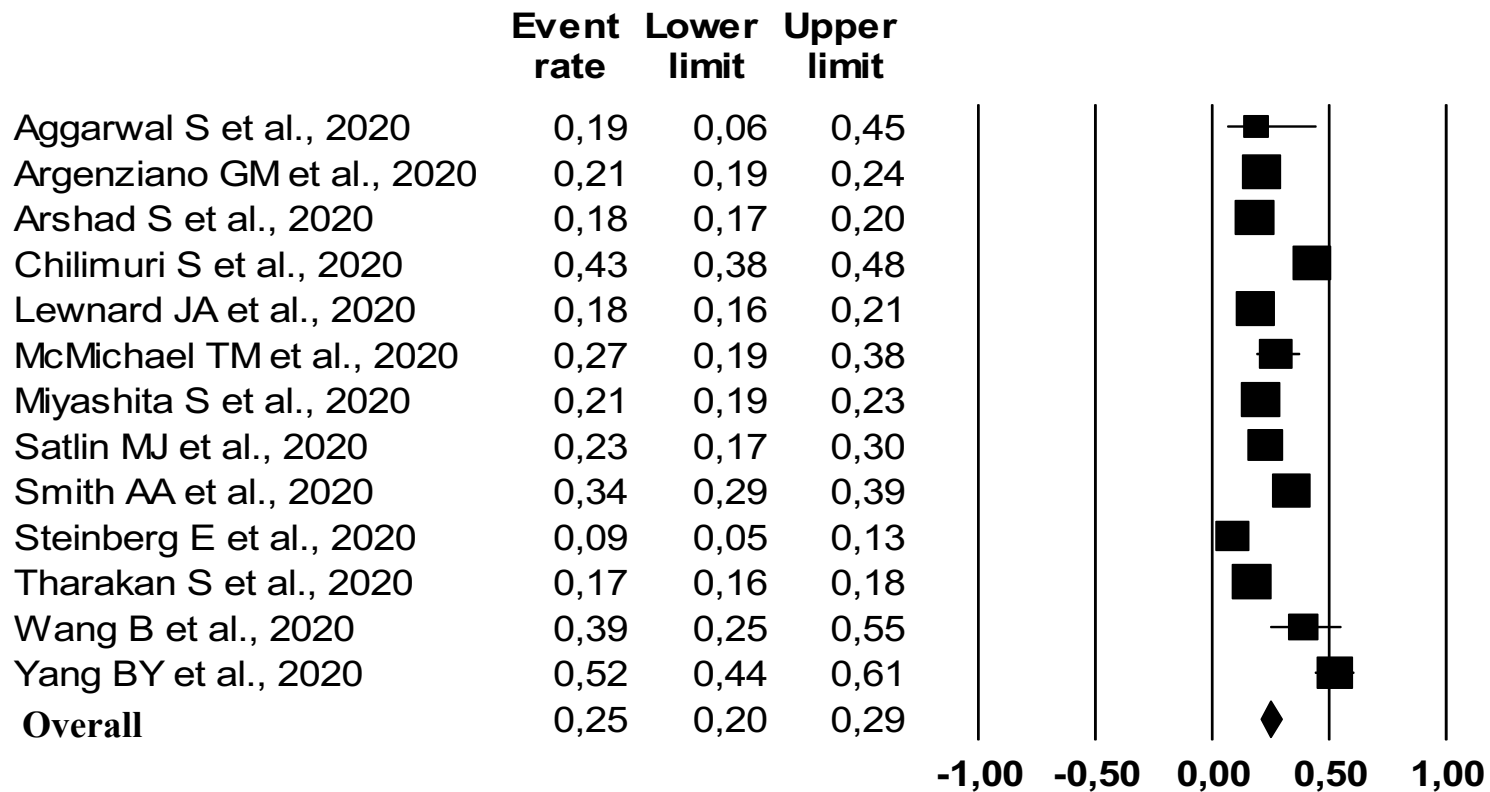

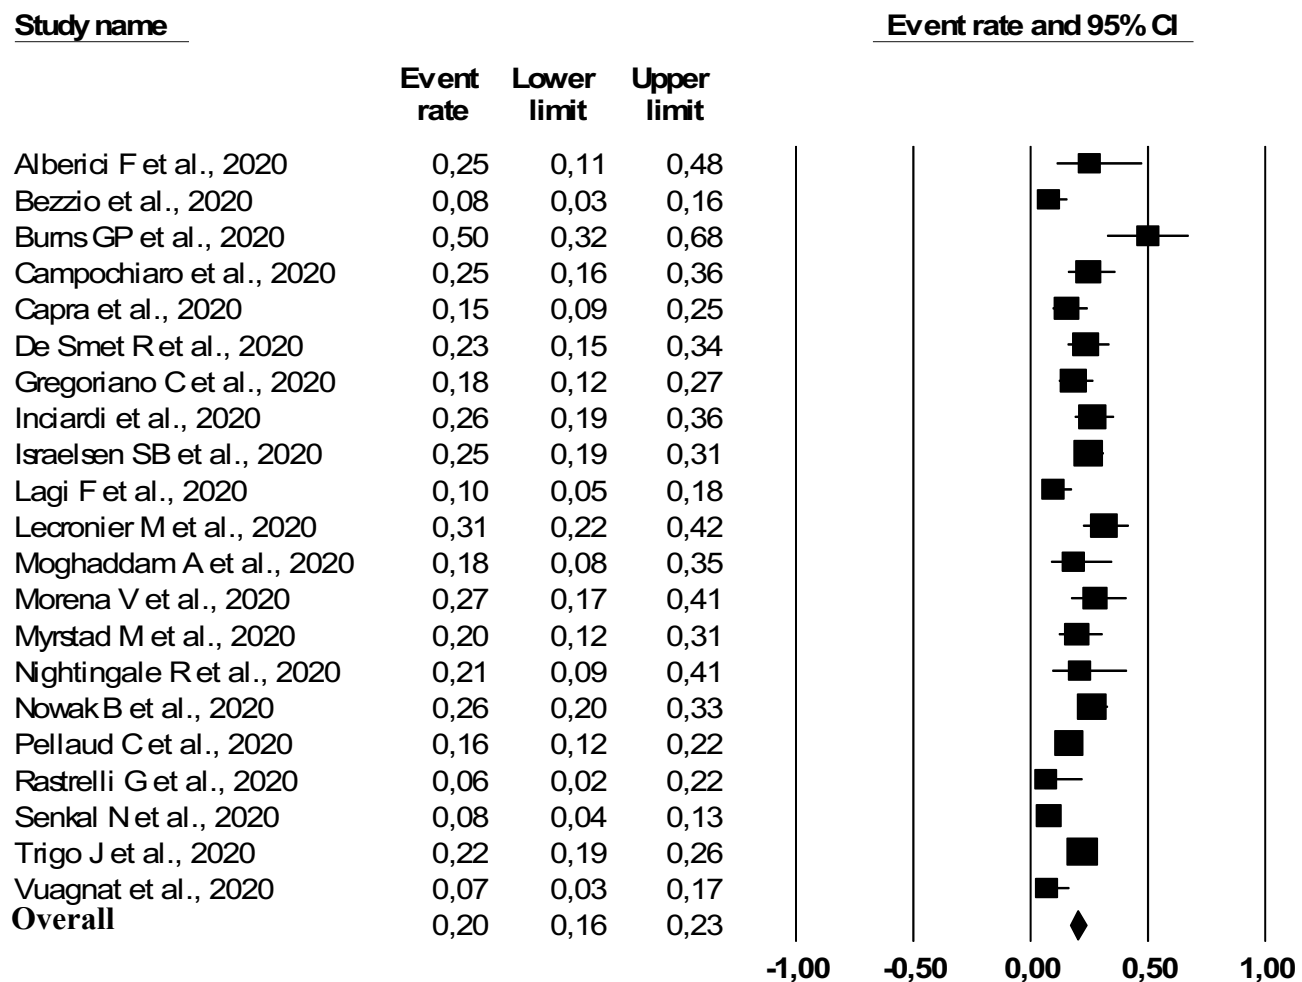

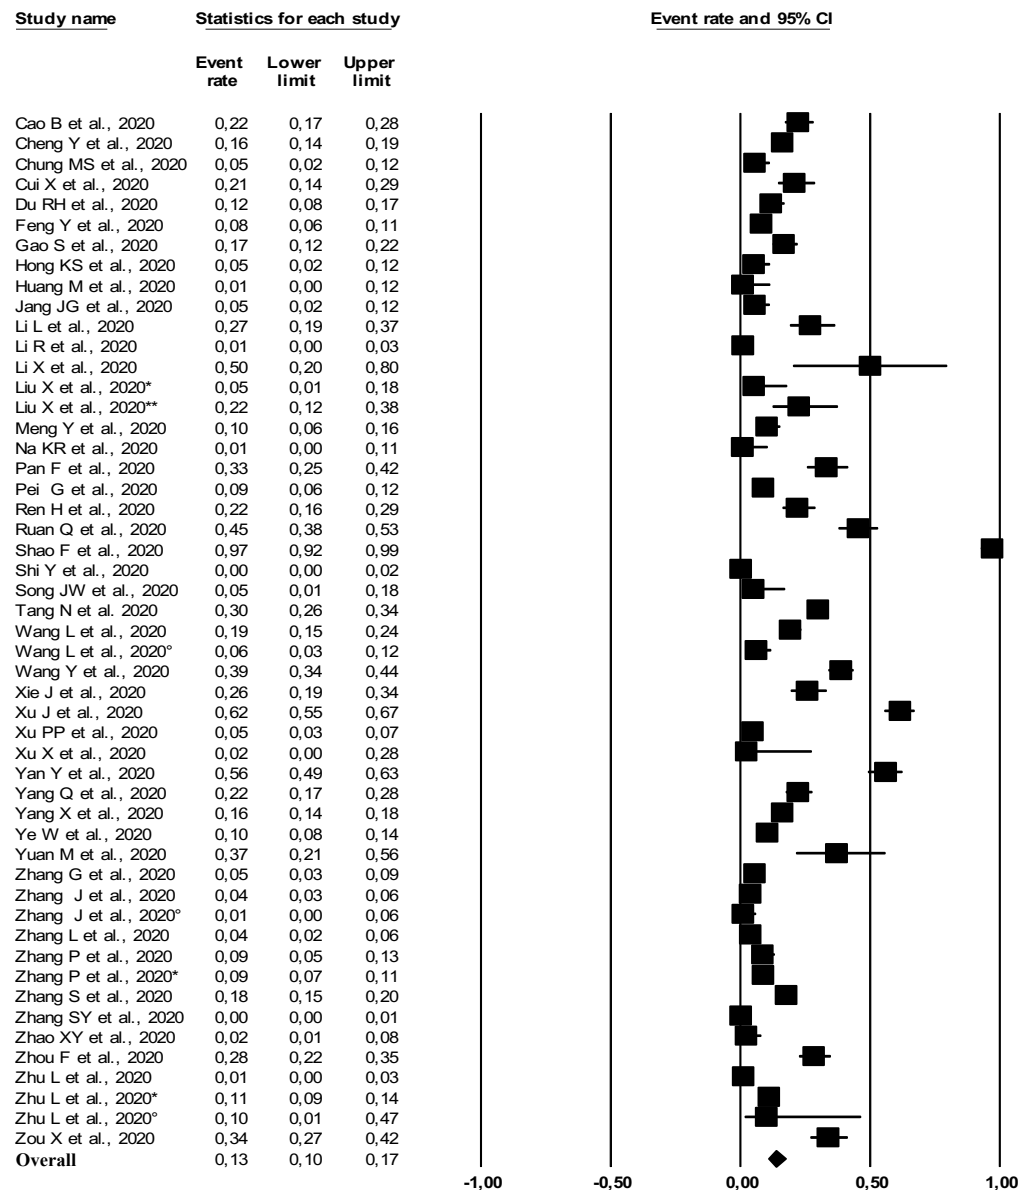

---

**Study name****Event rate and 95%CI**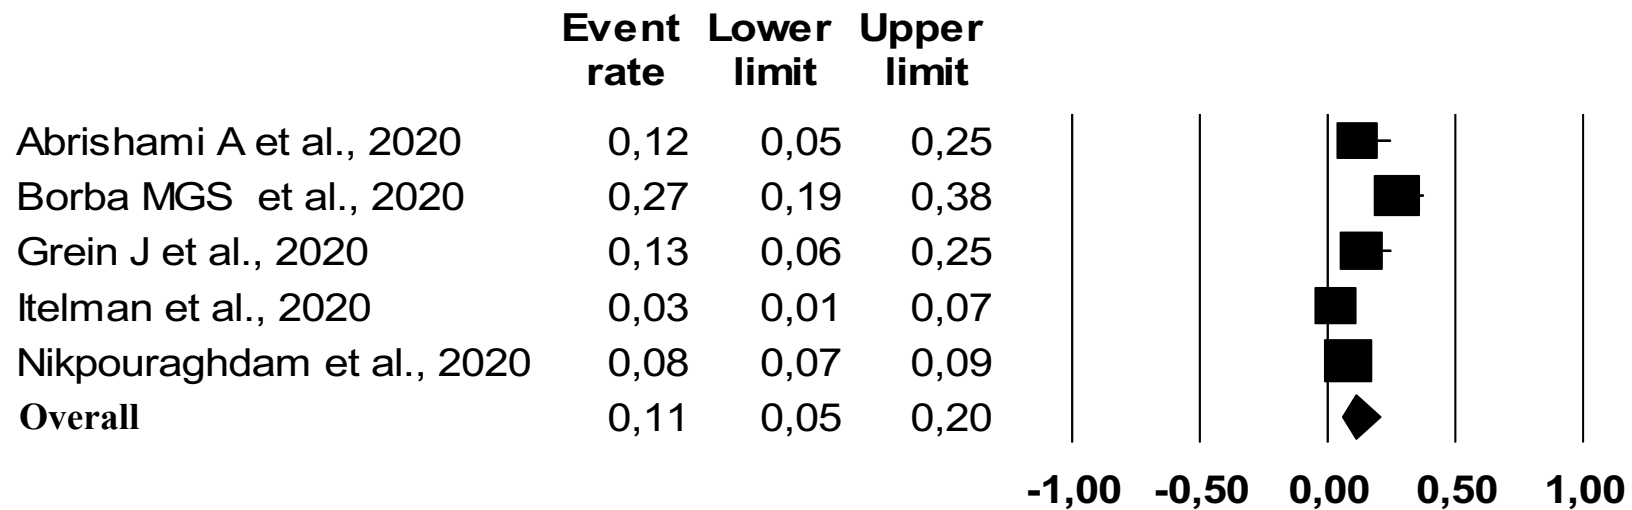

**Supplementary Figure 2.** Mortality rate according to different geographical areas: US (A), Europe (B), Asia (C) and other countries (D)
