# Supplementary material
Source: PubMed Central journal article supplement (PMC7899074)
Supplement: 11154_2021_9630_MOESM6_ESM.pdf [file 11154_2021_9630_MOESM6_ESM.pdf]

**A**

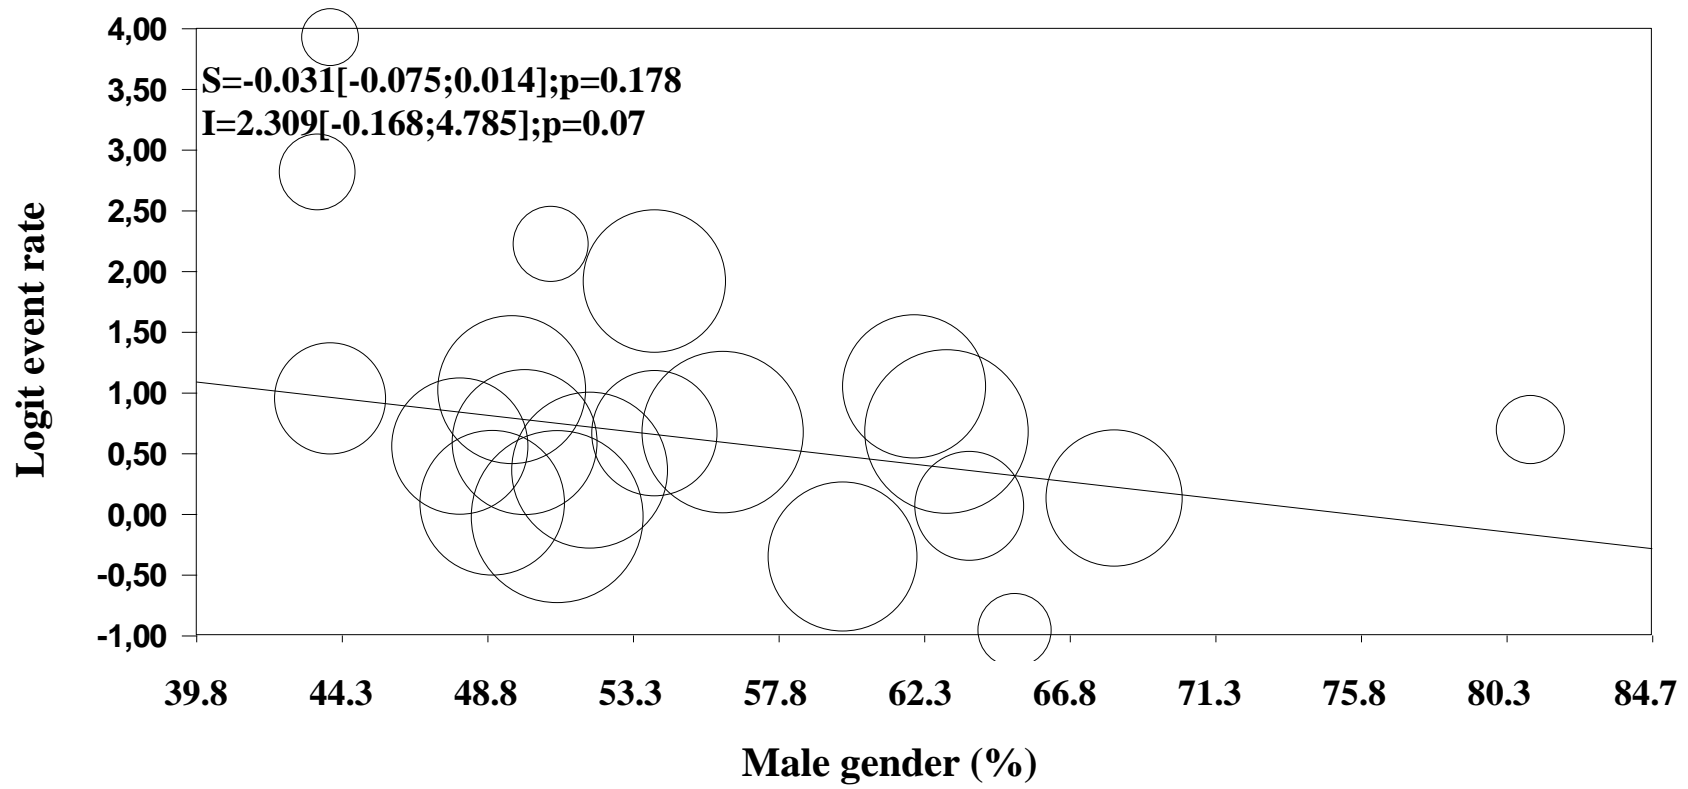

**B**

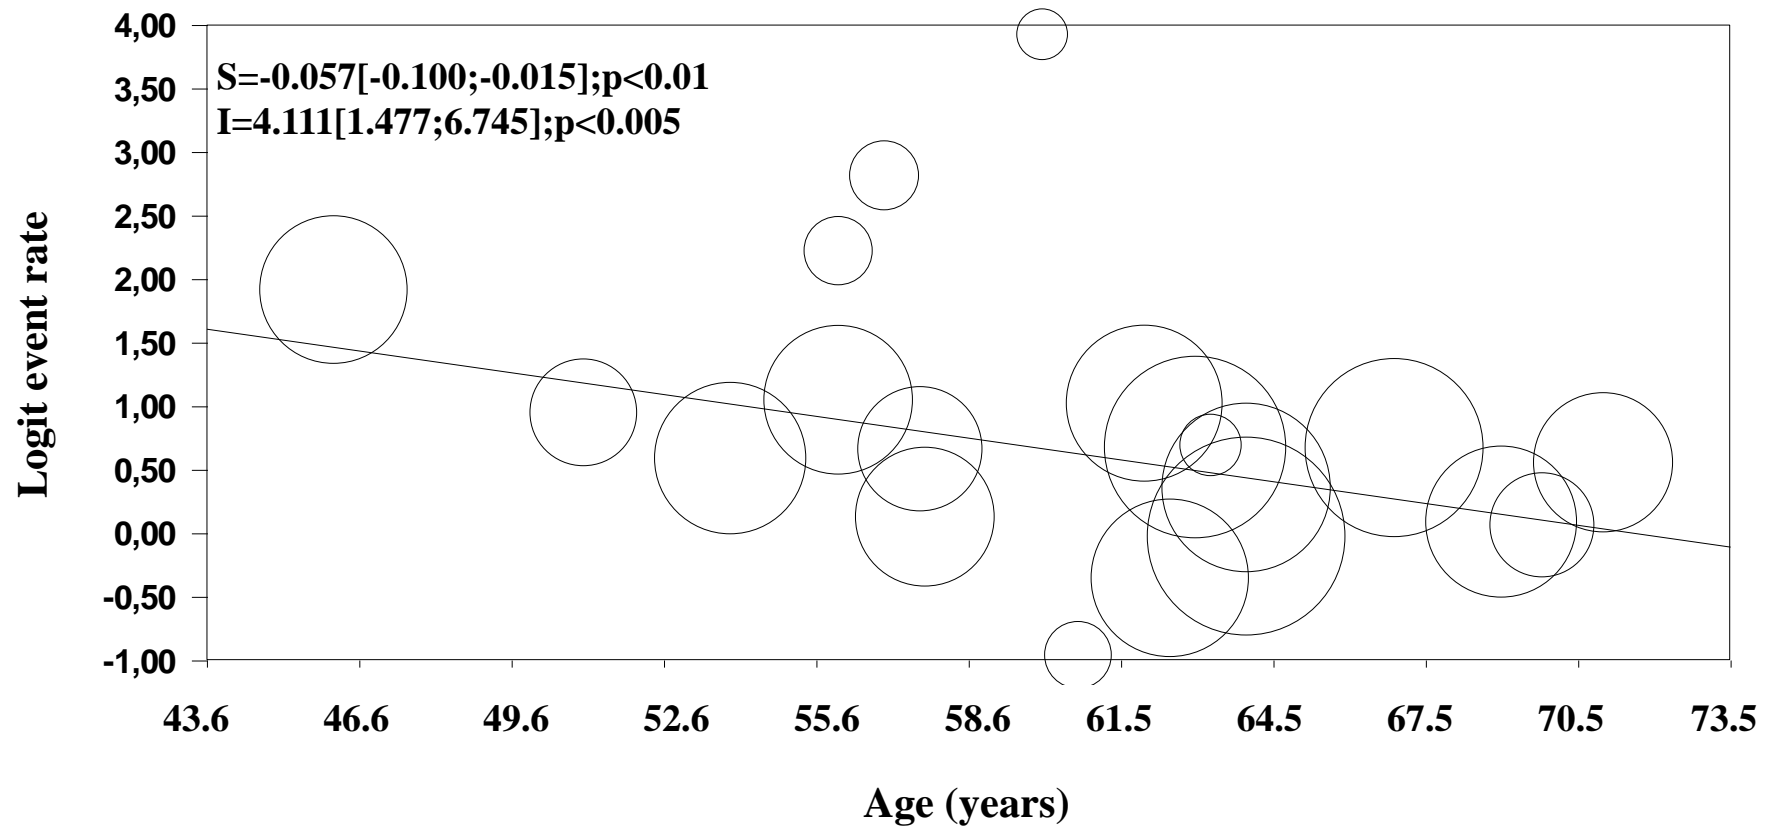

C

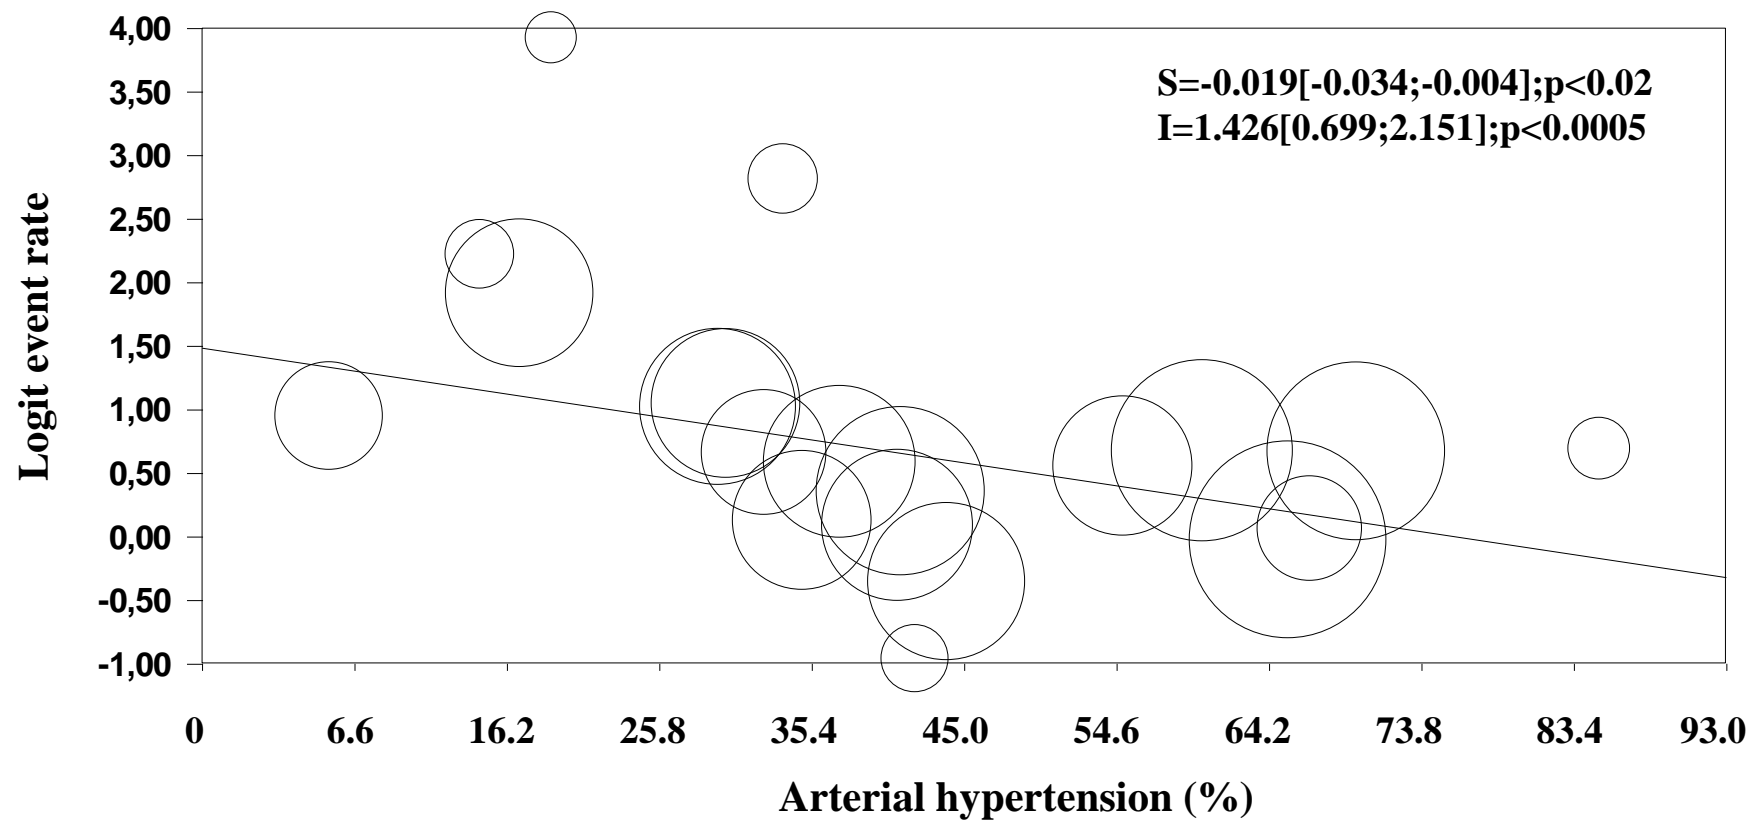

**D**

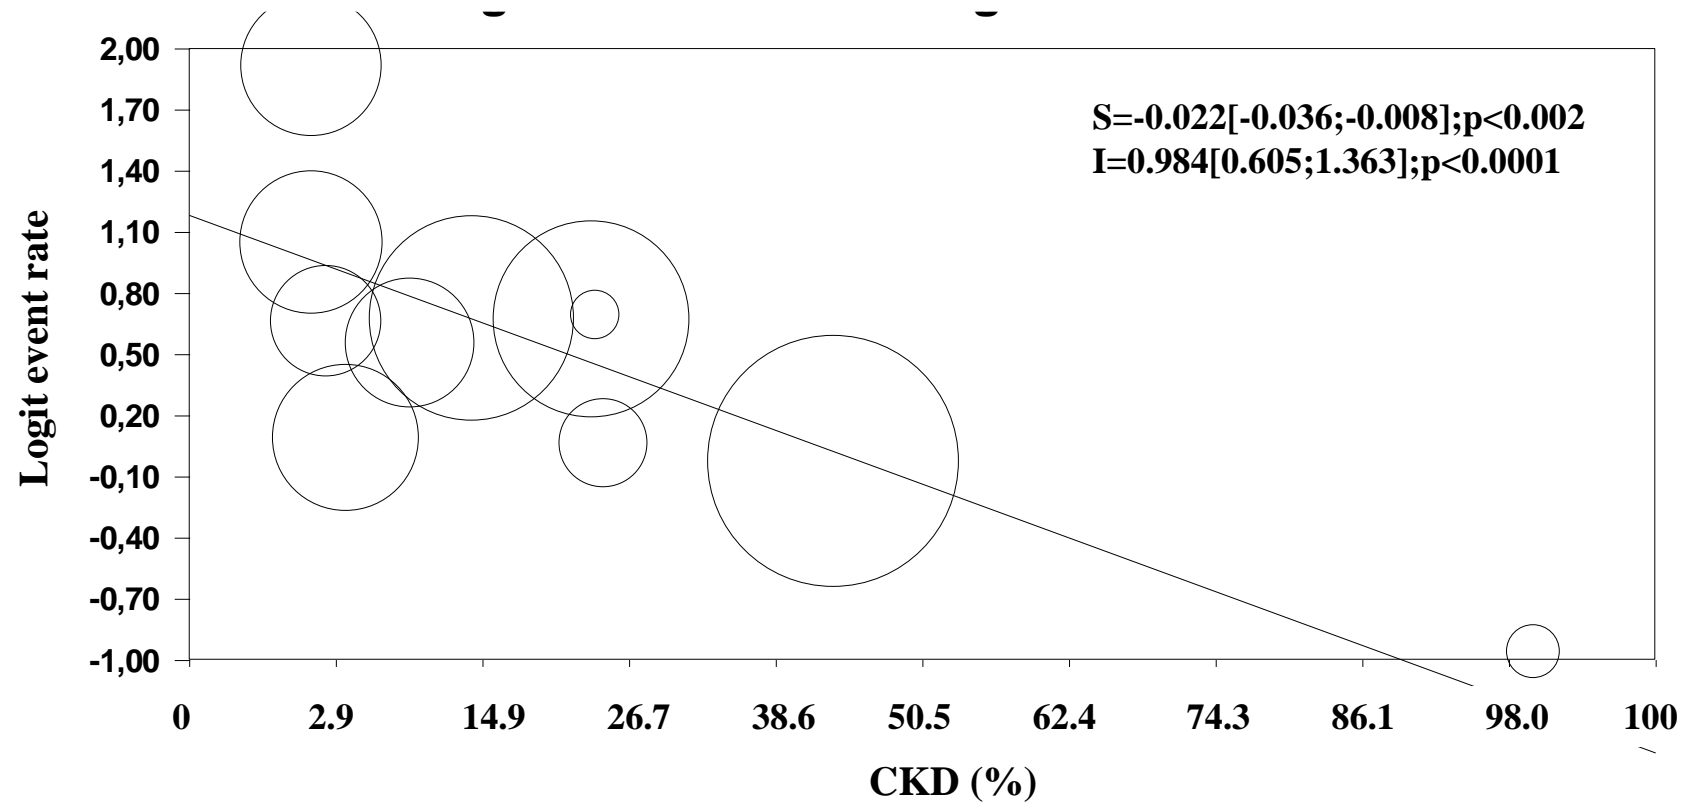

**E**

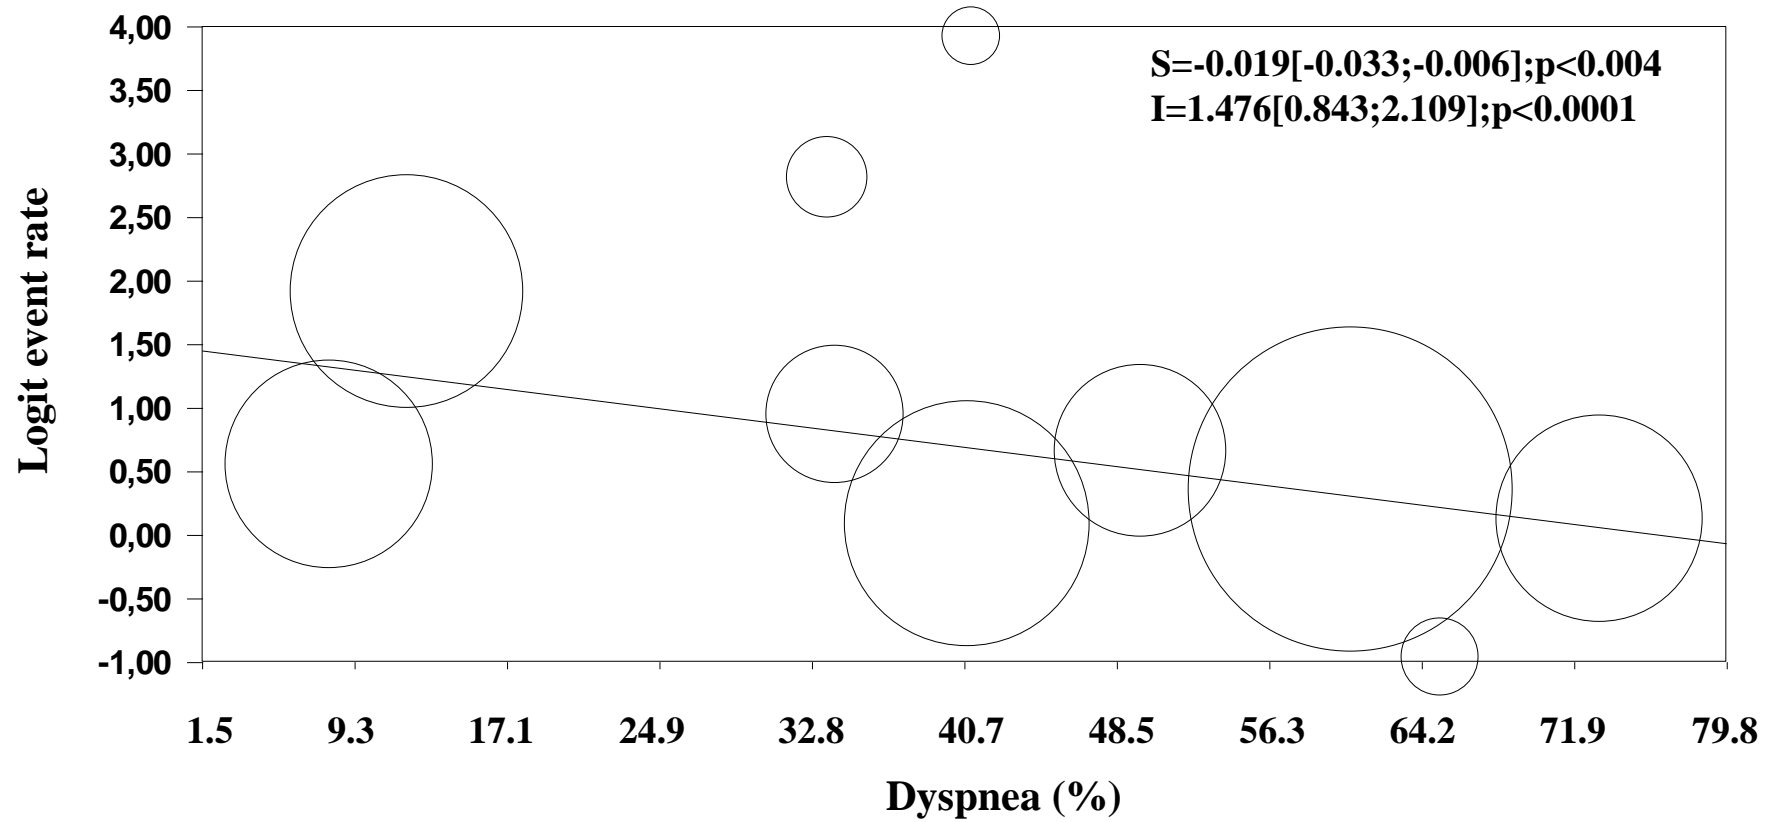

**F**

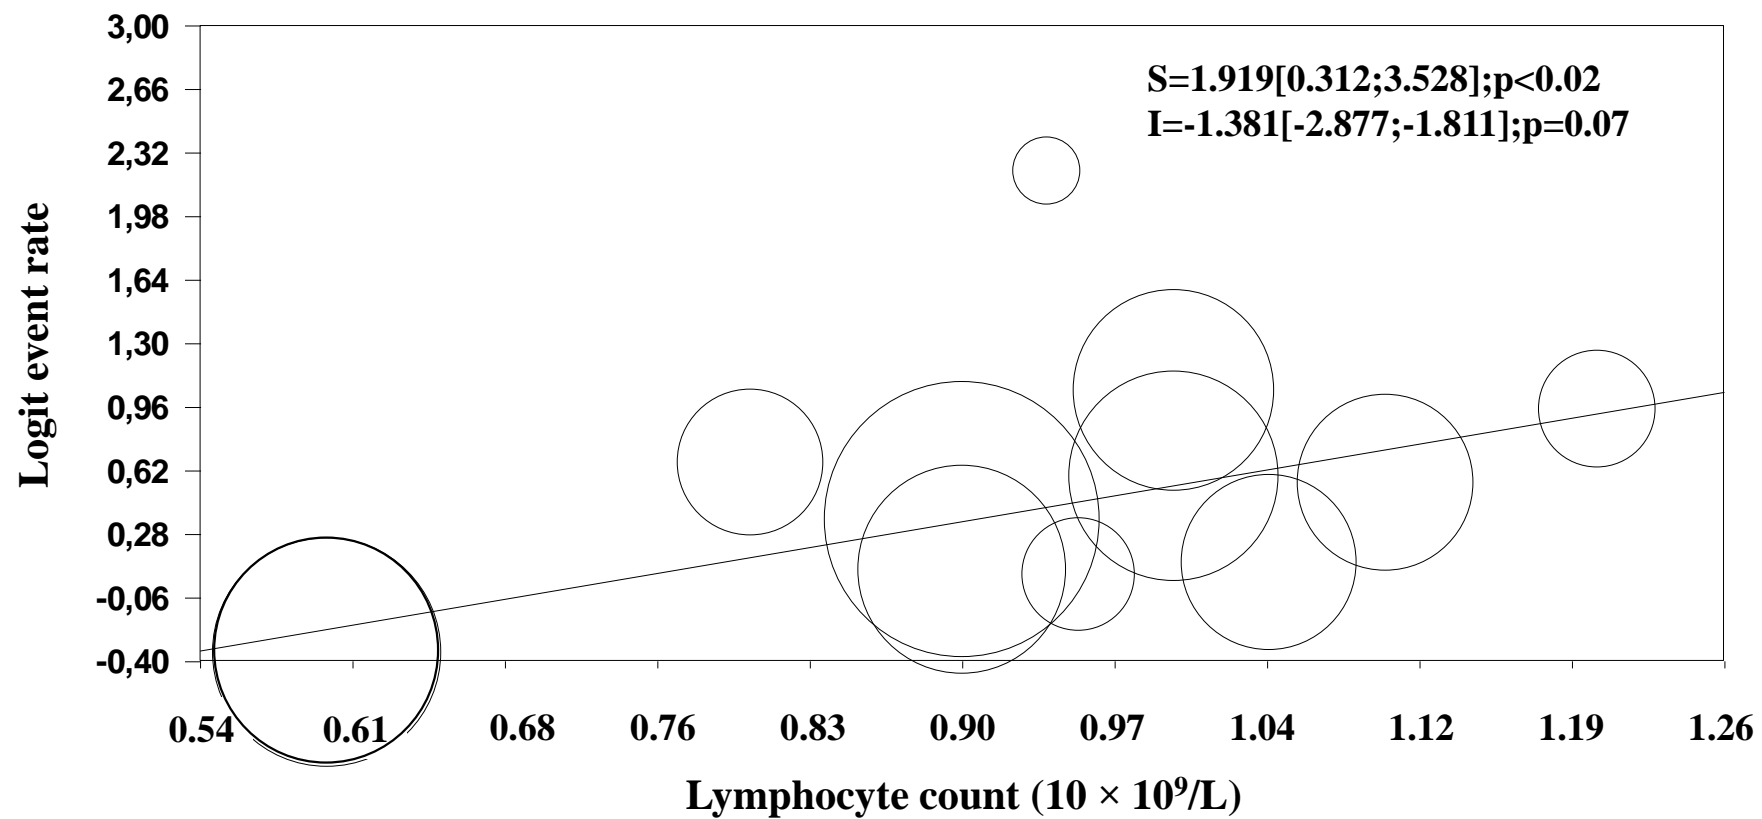

**Supplementary Figure 4.** Diabetes mellitus related mortality rate according to different parameters: male sex (A), age (B), severe (A), arterial hypertension (C), chronic kidney diseases (D), dyspnea (E), and lymphocyte count (F)
