# Supplementary material
Source: PubMed Central journal article supplement (PMC7899074)
Supplement: 11154_2021_9630_MOESM7_ESM.pdf [file 11154_2021_9630_MOESM7_ESM.pdf]

**A**

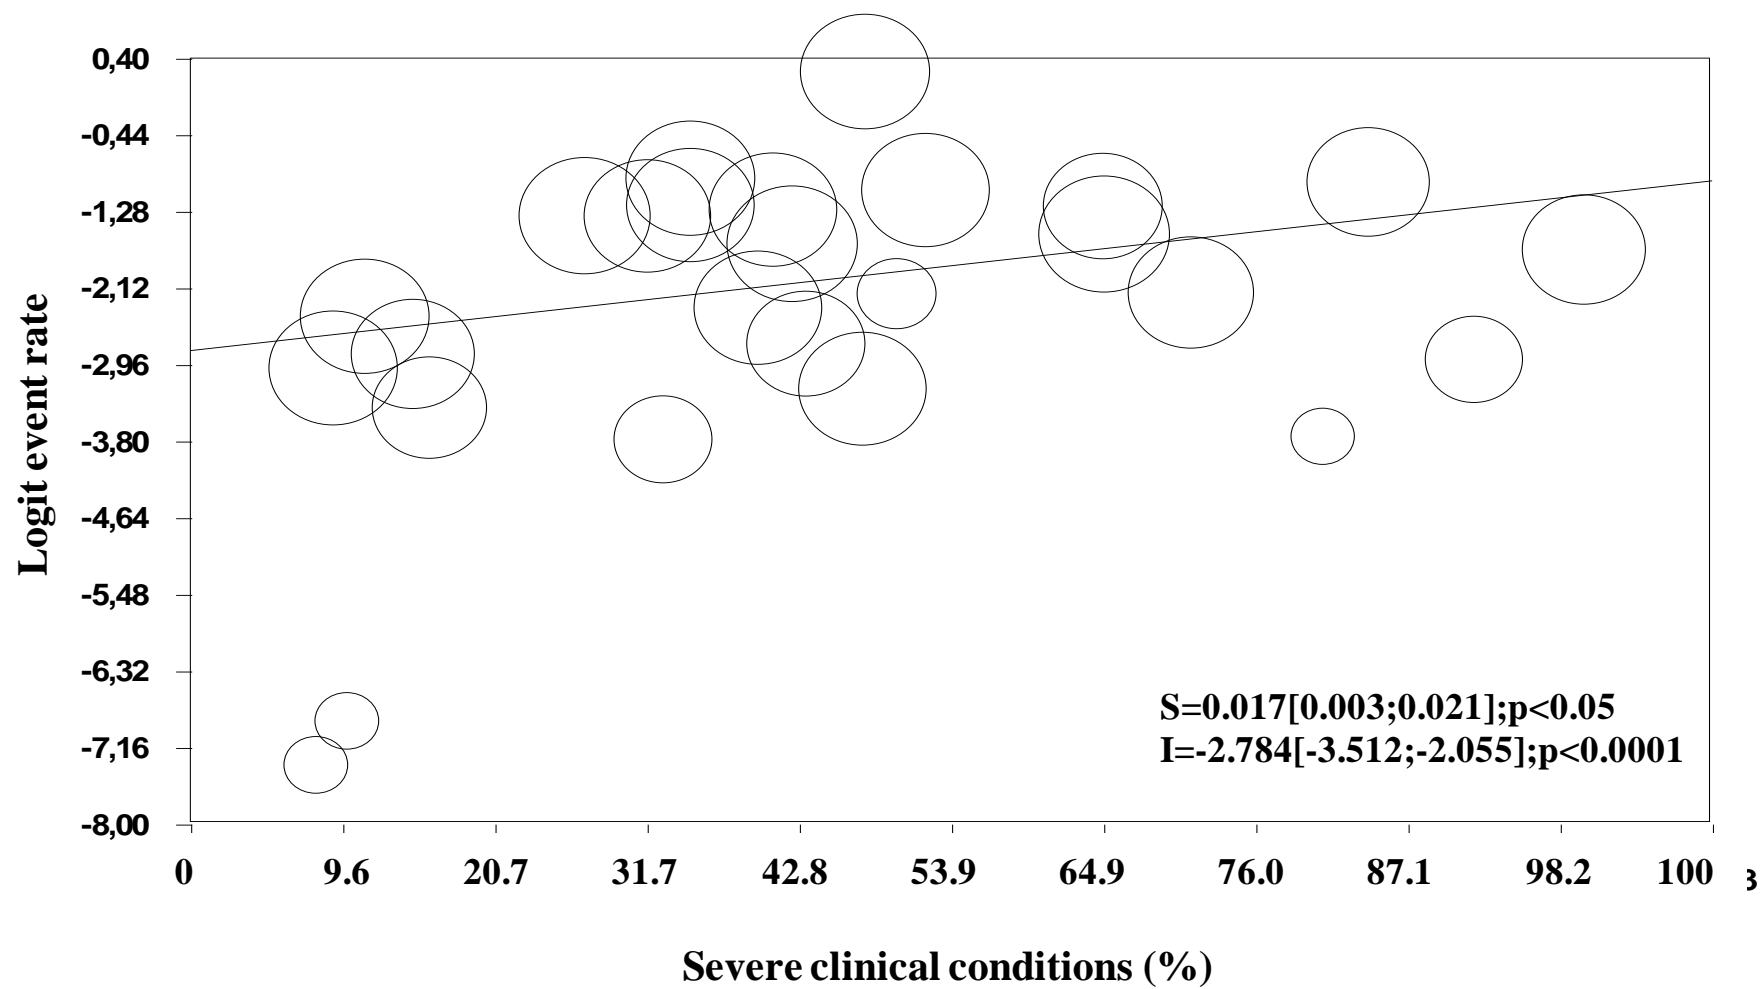

**B**

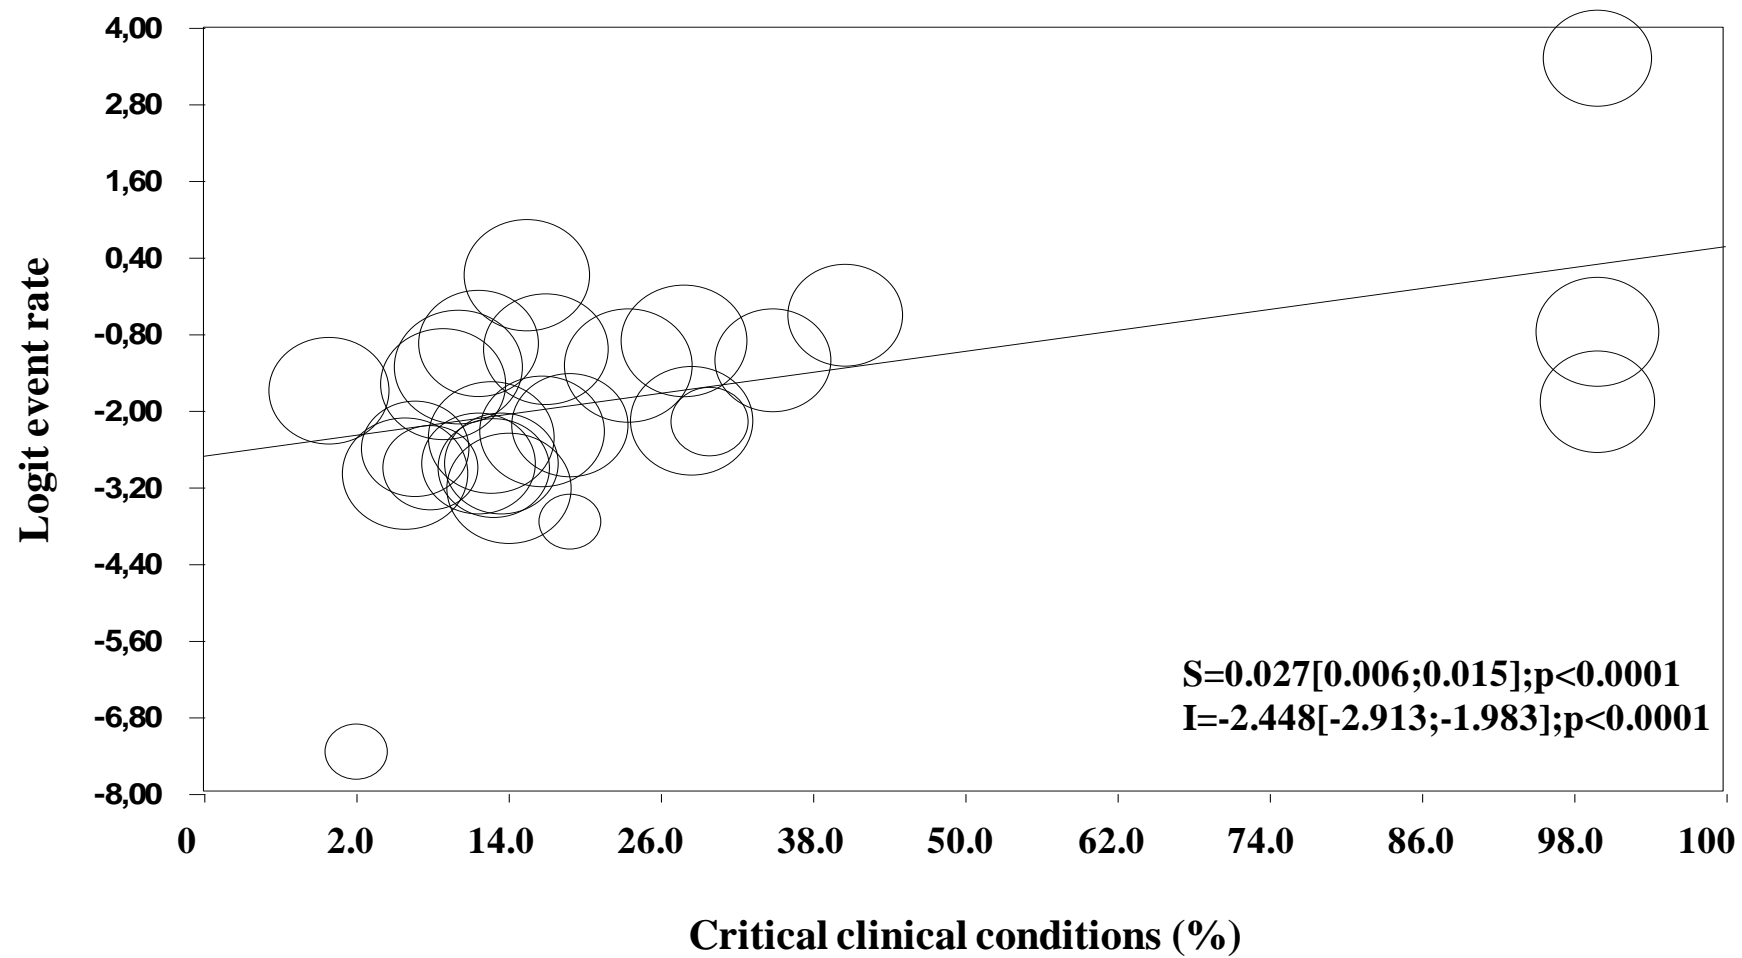

**C**

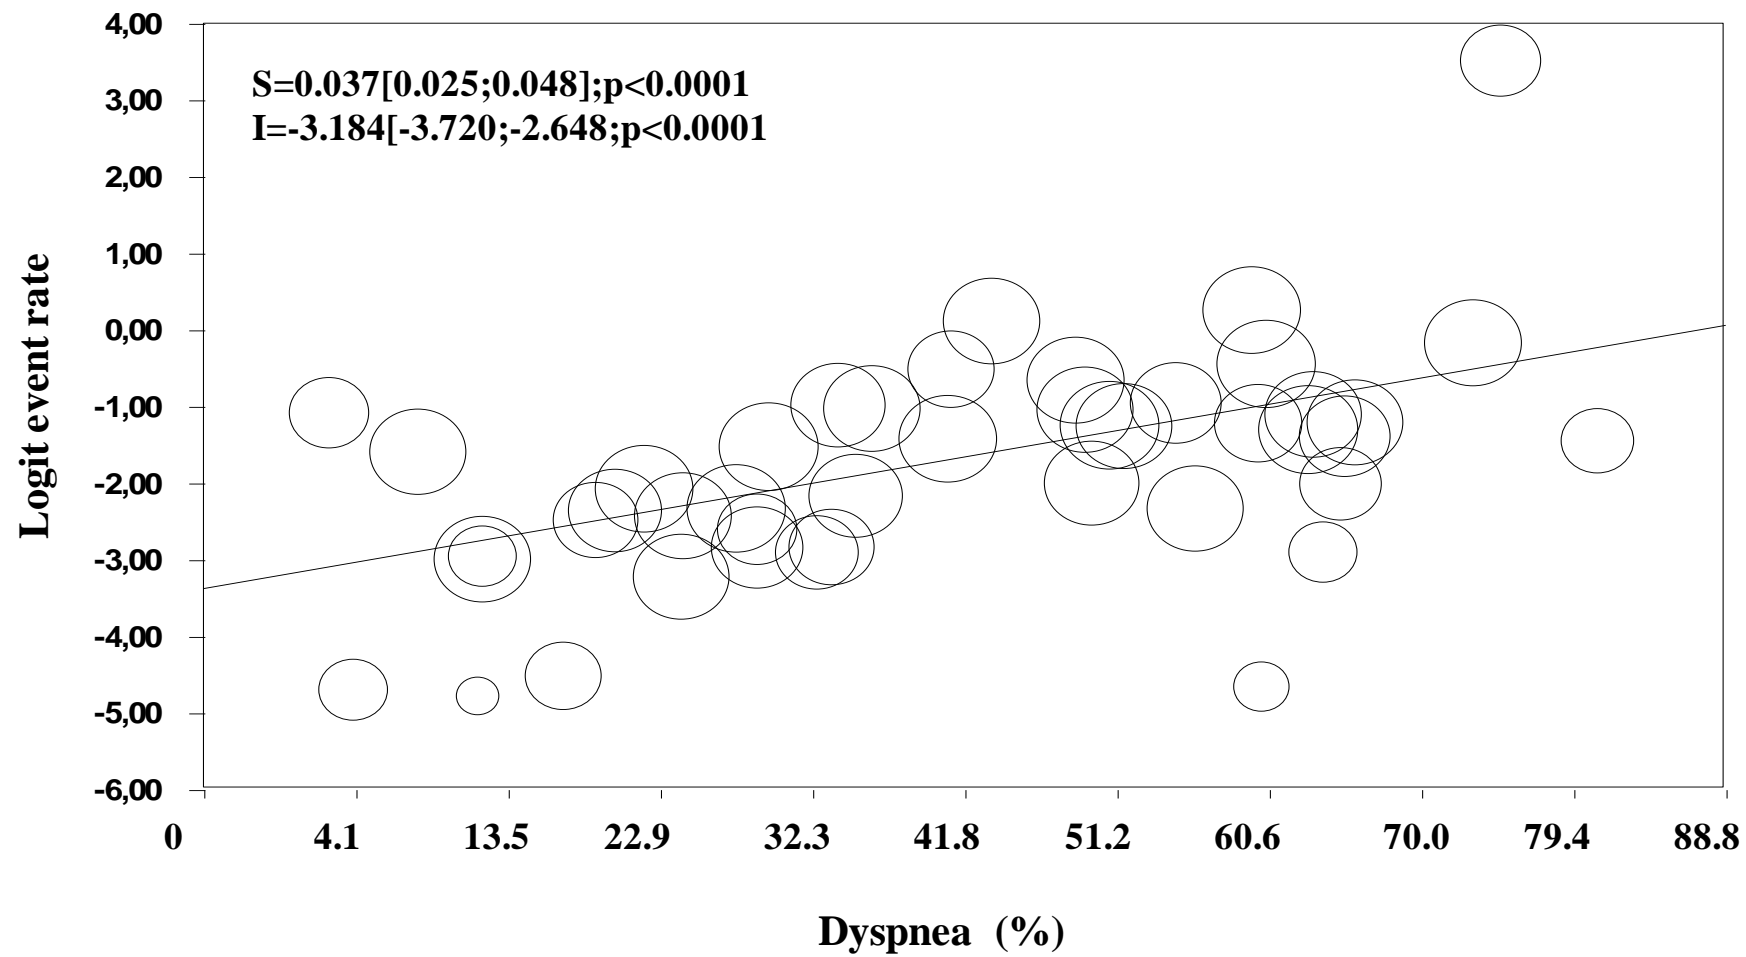

**D**

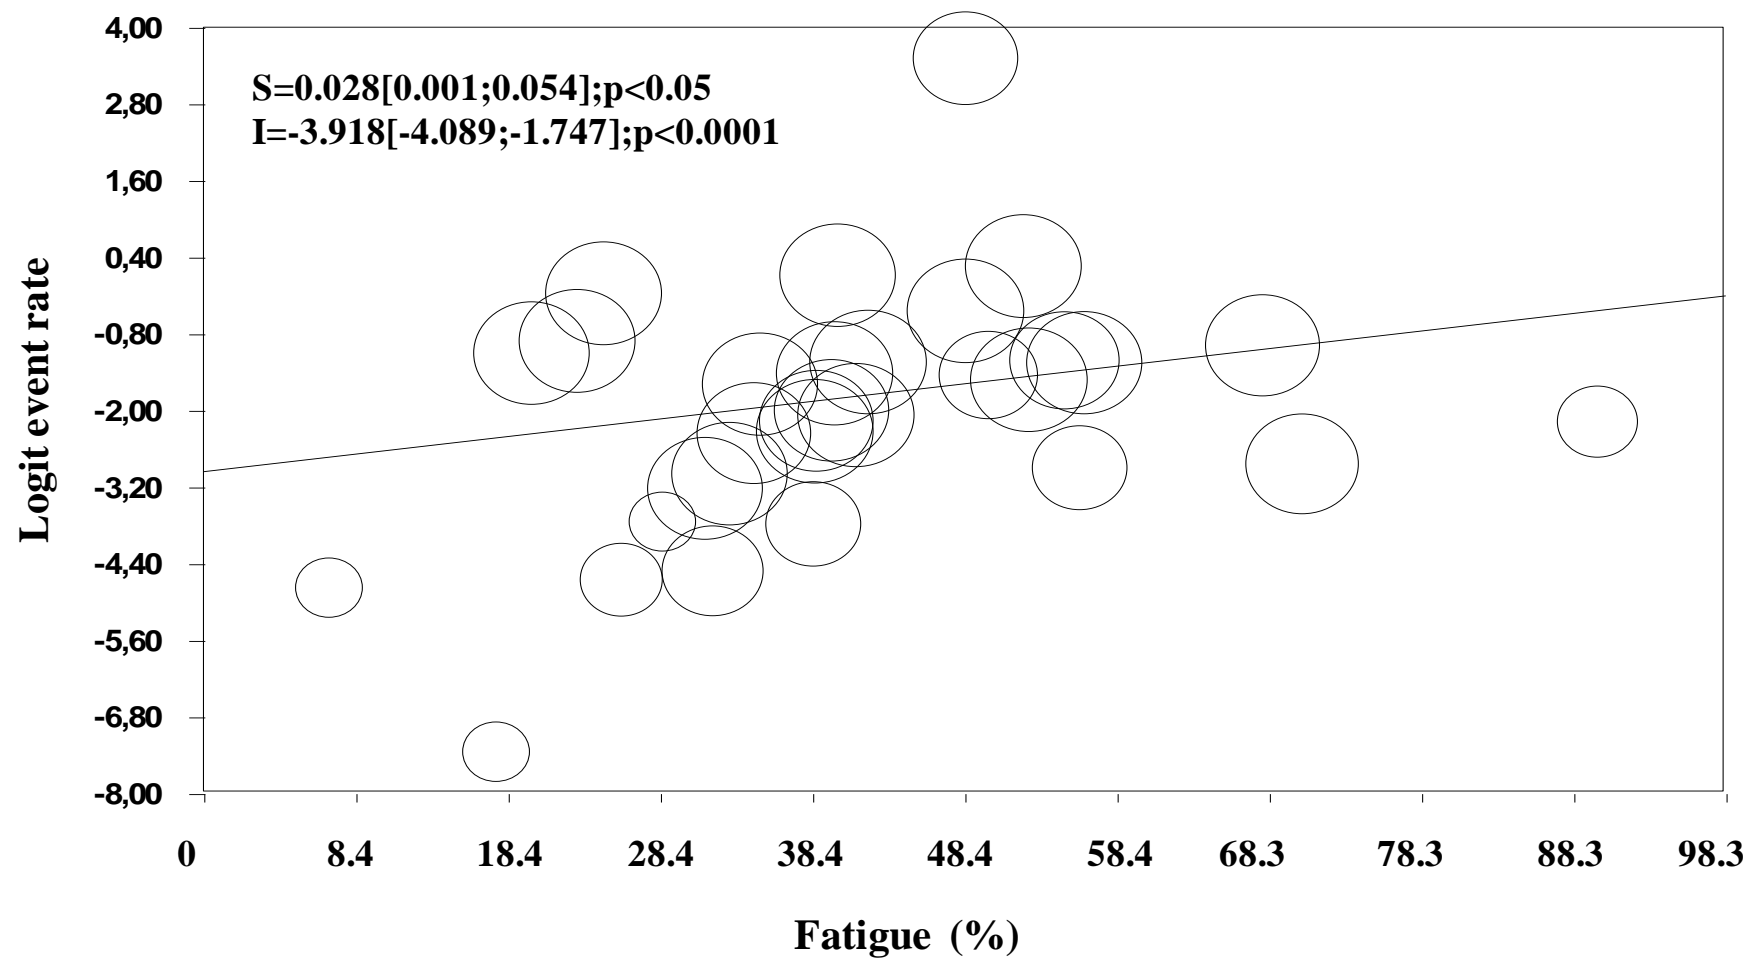

**E**

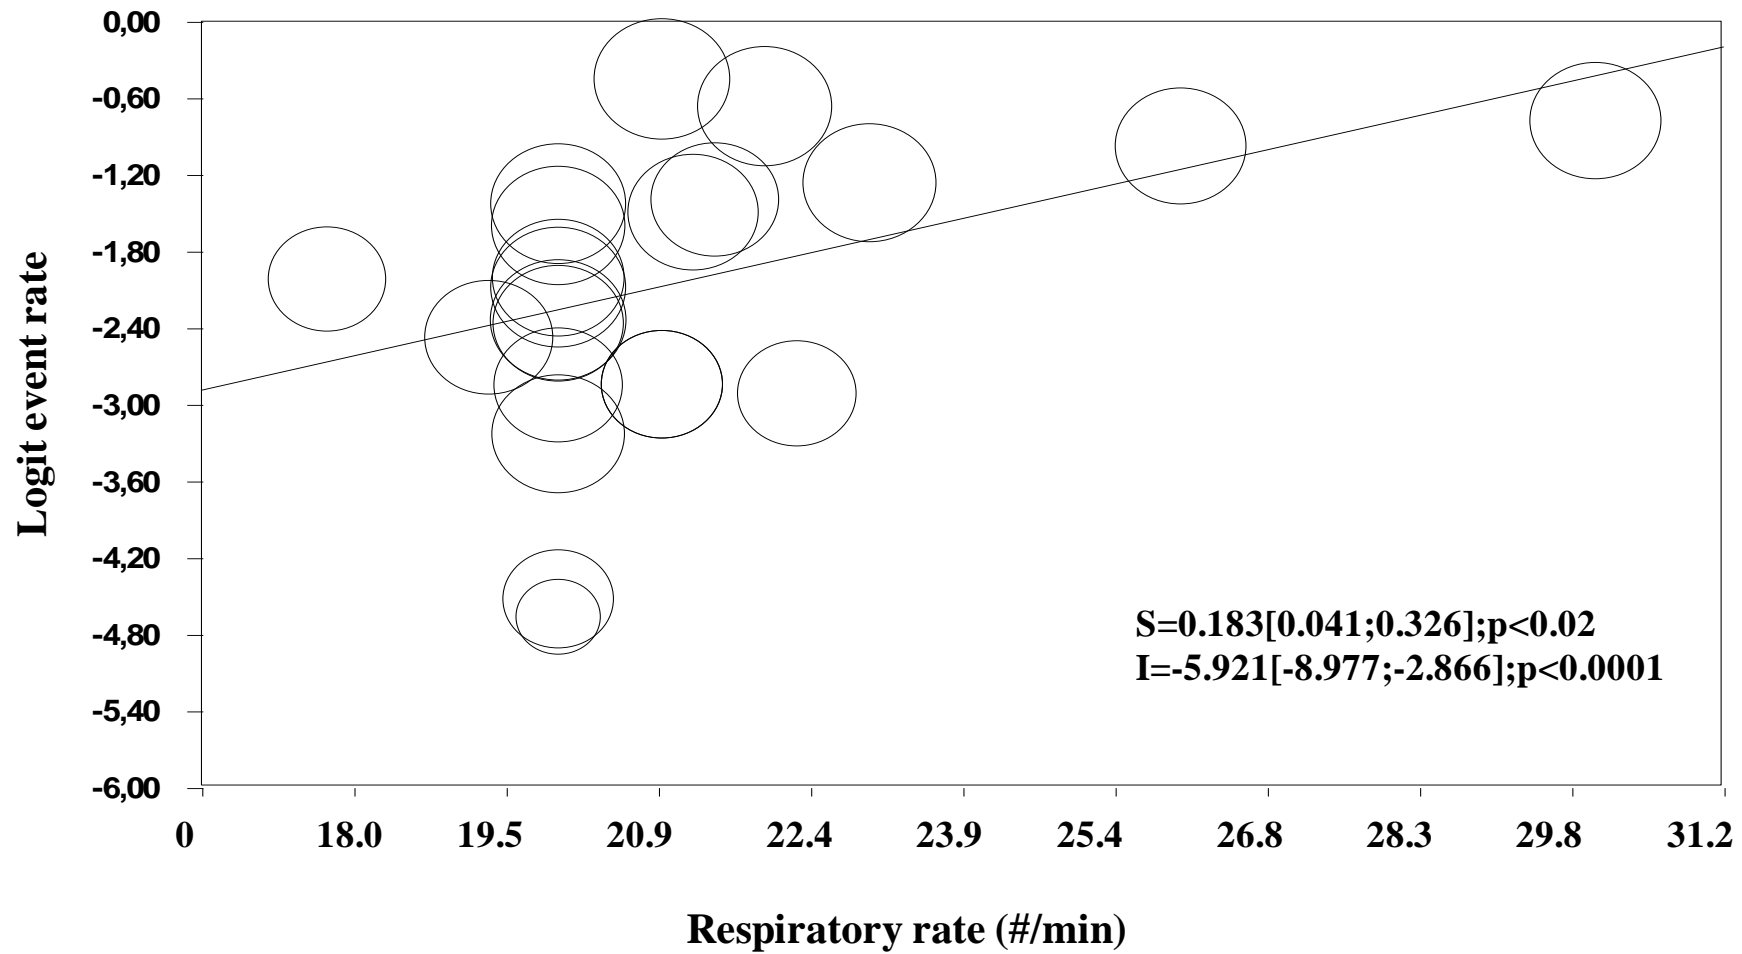

**F**

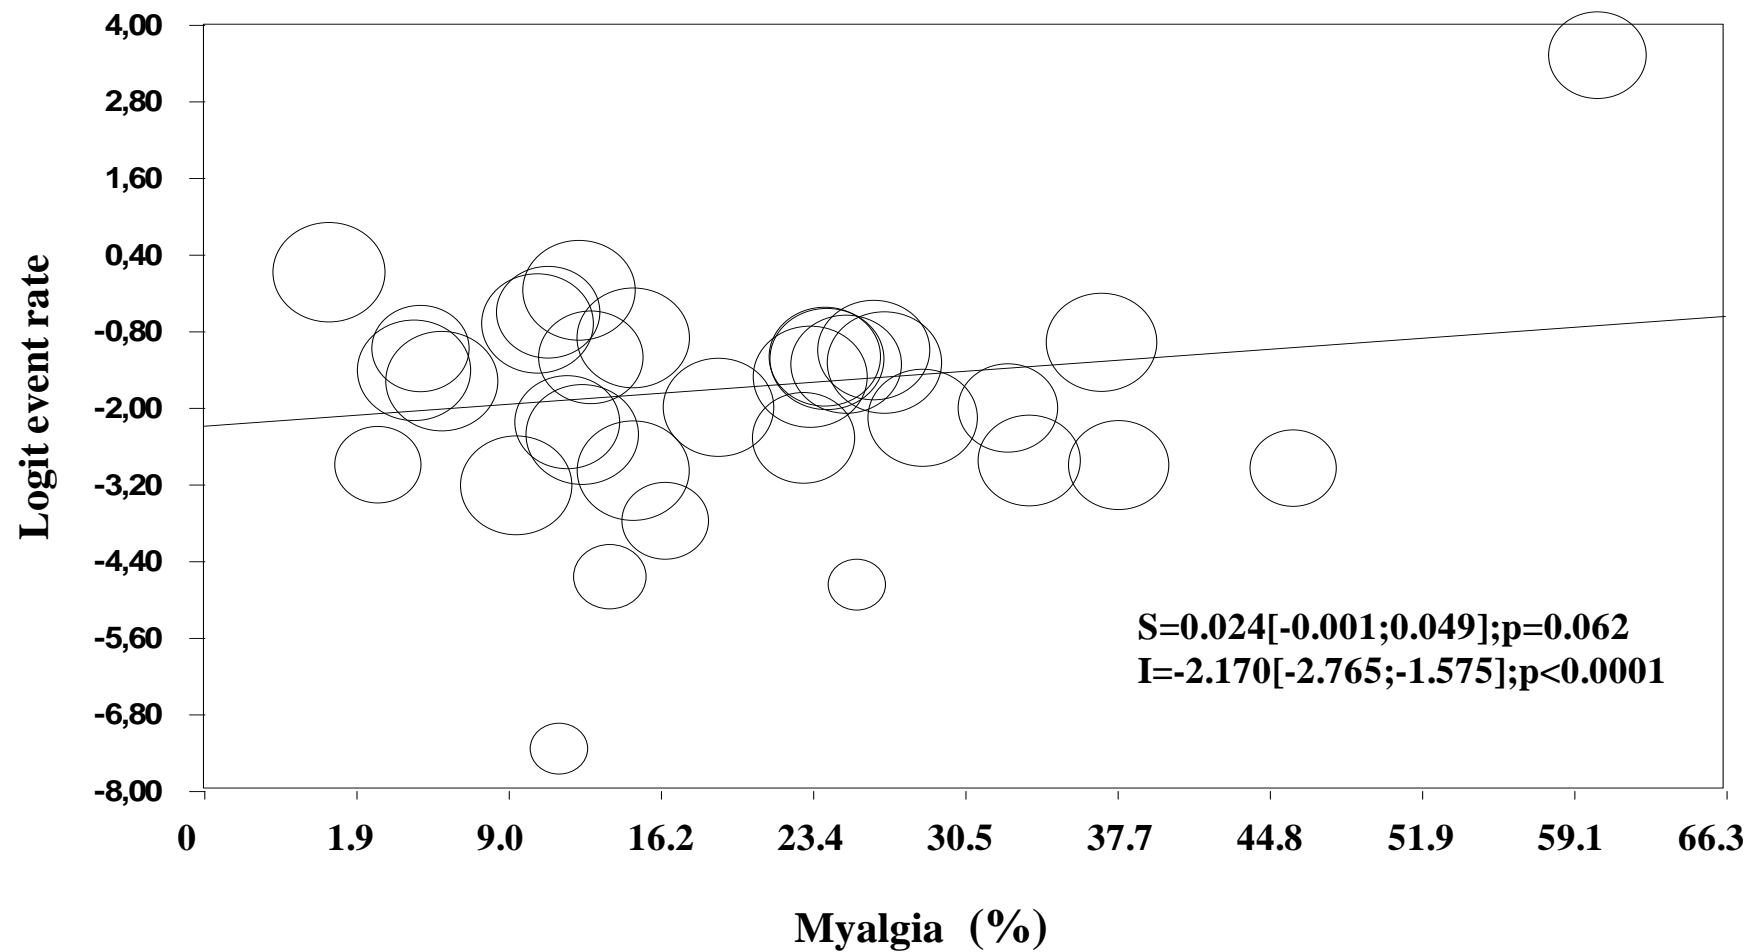

**Supplementary Figure 5.** Mortality rate according to different clinical parameters: severe (A) or critical (B) clinical conditions, dyspnea (C) fatigue (D), respiratory rate (E) and myalgia (F)
