# Supplementary material
Source: PubMed Central journal article supplement (PMC7899074)

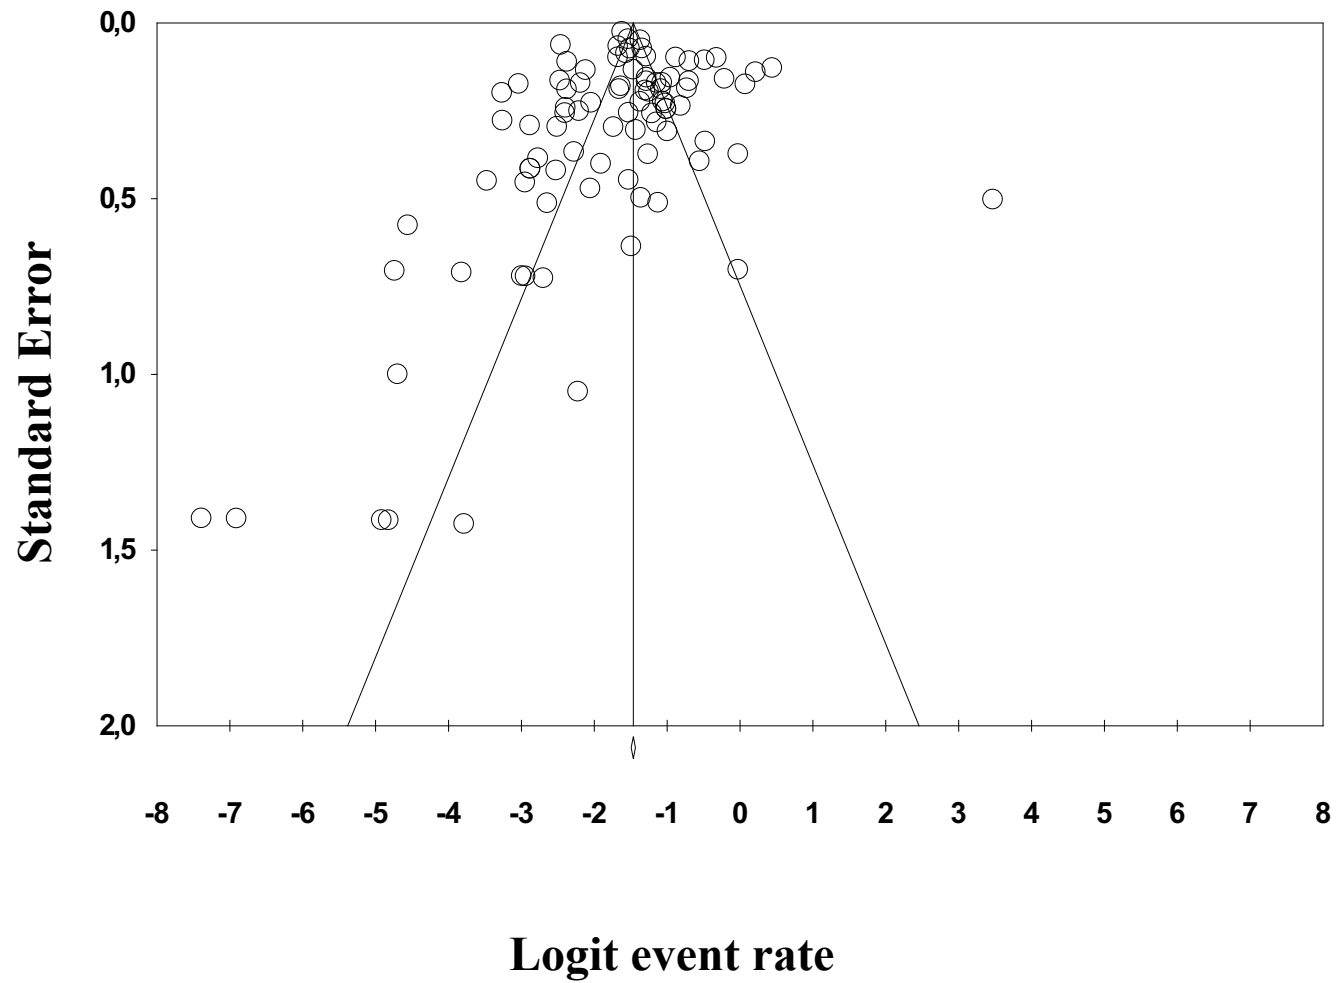

**Supplementary Figure 3.** Mortality rate according to male sex prevalence (A) and age (B)

Supplement: 11154_2021_9630_MOESM3_ESM.pdf [file 11154_2021_9630_MOESM3_ESM.pdf]

**A**

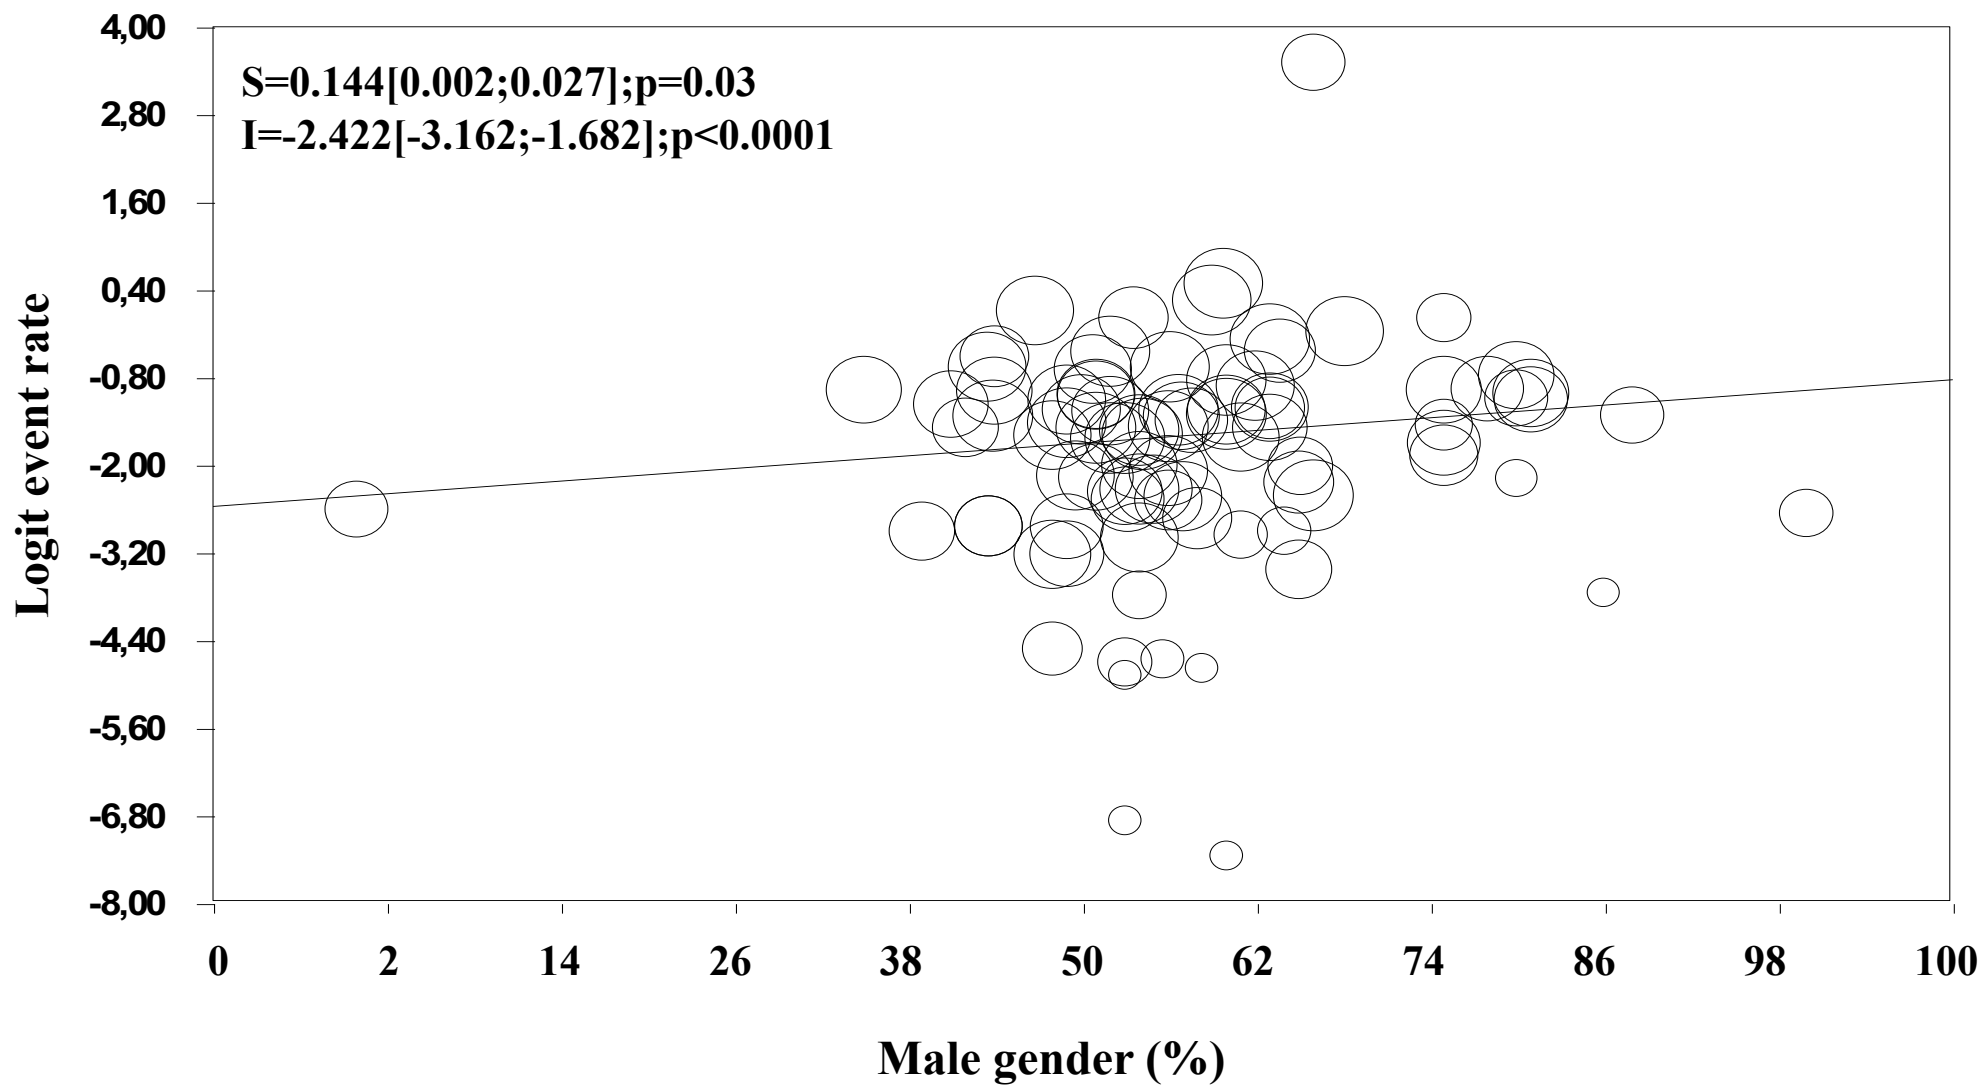

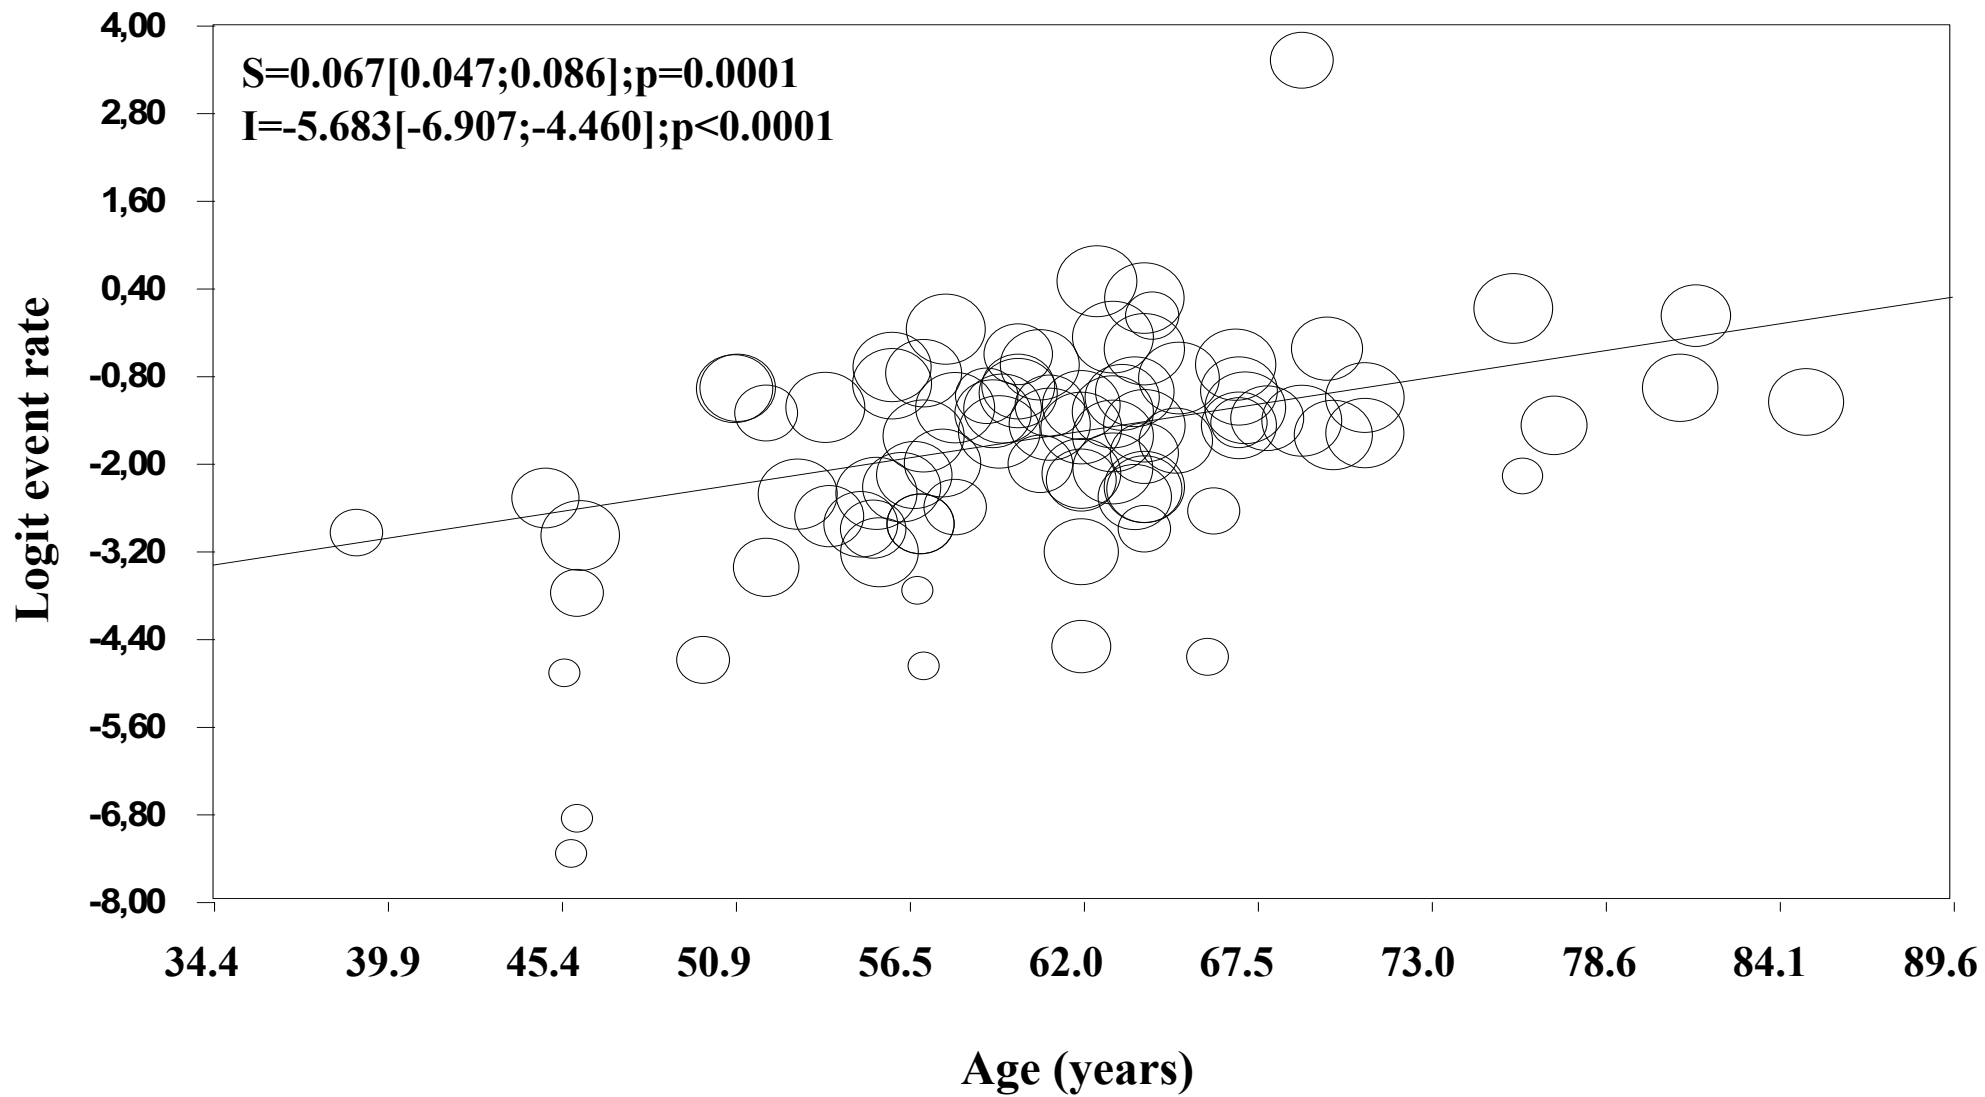

**Supplementary Figure 3.** Mortality rate according to male sex prevalence (A) and age (B)

Supplement: 11154_2021_9630_MOESM5_ESM.pdf [file 11154_2021_9630_MOESM5_ESM.pdf]
